# Supplementary material
Source: HighWire-hosted journal article supplement (https://erj.ersjournals.com/content/59/2/2100671)
Supplement: inline-supplementary-material-2 [file inline-supplementary-material-2.pdf]

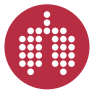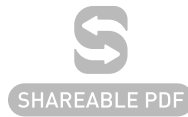

# The rescue of F508del-CFTR by elexacaftor/tezacaftor/ivacaftor (Trikafta) in human airway epithelial cells is underestimated due to the presence of ivacaftor

Frédéric Becq<sup>1</sup>, Sandra Mirval<sup>1</sup>, Thomas Carrez<sup>1,2</sup>, Manuella Lévêque<sup>1</sup>, Arnaud Billet <sup>1</sup>, Christelle Coraux<sup>3</sup>, Edouard Sage<sup>4,5</sup> and Anne Cantereau<sup>1</sup>

<sup>1</sup>Laboratoire Signalisation et Transports Ioniques Membranaires, Université de Poitiers, Poitiers, France. <sup>2</sup>ManRos therapeutics, Presqu'île de Perharidy, Roscoff, France. <sup>3</sup>INSERM UMR-S 1250, Université de Reims-Champagne Ardenne, Reims, France. <sup>4</sup>INRAE UMR 0892, Université Versailles-Saint-Quentin-en-Yvelines, Versailles, France. <sup>5</sup>Service de Chirurgie Thoracique et Transplantation Pulmonaire, Hôpital Foch, Suresnes, France.

Corresponding author: Frédéric Becq ([frederic.becq@univ-poitiers.fr](mailto:frederic.becq@univ-poitiers.fr))

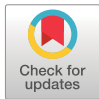

Shareable abstract (@ERSpublications)

**Ivacaftor is not able to potentiate the function of Trikafta-rescued F508del-CFTR due to its destabilising effect. Ivacaftor does not preclude the use of different potentiators combined with Trikafta, so the beneficial effect of Trikafta is underestimated.** <https://bit.ly/3dxlsJb>

**Cite this article as:** Becq F, Mirval S, Carrez T, *et al.* The rescue of F508del-CFTR by elexacaftor/tezacaftor/ivacaftor (Trikafta) in human airway epithelial cells is underestimated due to the presence of ivacaftor. *Eur Respir J* 2022; 59: 2100671 [DOI: 10.1183/13993003.00671-2021].

This single-page version can be shared freely online.

Copyright ©The authors 2022.  
For reproduction rights and  
permissions contact  
[permissions@ersnet.org](mailto:permissions@ersnet.org)

This article has an editorial  
commentary:  
[https://doi.org/10.1183/  
13993003.02380-2021](https://doi.org/10.1183/13993003.02380-2021)

Received: 5 March 2021  
Accepted: 25 June 2021

## Abstract

Trikafta, currently the leading therapeutic in cystic fibrosis (CF), has demonstrated a real clinical benefit. This treatment is the triple combination therapy of two folding correctors elexacaftor/tezacaftor (VX445/VX661) plus the gating potentiator ivacaftor (VX770). In this study, our aim was to compare the properties of F508del-CFTR in cells treated with either lumacaftor (VX809), tezacaftor, elexacaftor, elexacaftor/tezacaftor with or without ivacaftor. We studied F508del-CFTR function, maturation and membrane localisation by Ussing chamber and whole-cell patch-clamp recordings, Western blot and immunolocalisation experiments. With human primary airway epithelial cells and the cell lines CFBE and BHK expressing F508del, we found that, whereas the combination elexacaftor/tezacaftor/ivacaftor was efficient in rescuing F508del-CFTR abnormal maturation, apical membrane location and function, the presence of ivacaftor limits these effects. The basal F508del-CFTR short-circuit current was significantly increased by elexacaftor/tezacaftor/ivacaftor and elexacaftor/tezacaftor compared to other correctors and nontreated cells, an effect dependent on ivacaftor and cAMP. These results suggest that the level of the basal F508del-CFTR current might be a marker for correction efficacy in CF cells. When cells were treated with ivacaftor combined to any correctors, the F508del-CFTR current was unresponsive to the subsequently acute addition of ivacaftor, unlike the CFTR (cystic fibrosis transmembrane conductance regulator) potentiators genistein and Cact-A1 which increased elexacaftor/tezacaftor/ivacaftor and elexacaftor/tezacaftor-corrected F508del-CFTR currents. These findings show that ivacaftor reduces the correction efficacy of Trikafta. Thus, combining elexacaftor/tezacaftor with a different potentiator might improve the therapeutic efficacy for treating CF patients.
